# Supplementary material for: Gender Differences in Psychological Symptoms and Quality of Life in Patients with Inflammatory Bowel Disease in China: A Multicenter Study
Source: J Clin Med. 2023 Feb 23;12(5):1791. doi: 10.3390/jcm12051791 (PMC10002859; doi:10.3390/jcm12051791)
Supplement: Supplementary file 1 [file jcm-12-01791-s001.zip › Supplementary Table S1.pdf]

**Supplementary Table S1.** Scores of psychological symptoms, sleep quality and quality of life related scales in IBD patients of different

| genders (score, $\bar{x}\pm s$ ) |                           |                            |          |                 |                          |                            |          |                 |                          |                            |          |                 |
|----------------------------------|---------------------------|----------------------------|----------|-----------------|--------------------------|----------------------------|----------|-----------------|--------------------------|----------------------------|----------|-----------------|
| Projects                         | IBD( <i>n</i> =2478)      |                            | <i>t</i> | <i>P</i> -value | UC( <i>n</i> =1371)      |                            | <i>t</i> | <i>P</i> -value | CD( <i>n</i> =1107)      |                            | <i>t</i> | <i>P</i> -value |
|                                  | Male<br>( <i>n</i> =1547) | Female<br>( <i>n</i> =931) |          |                 | Male<br>( <i>n</i> =754) | Female<br>( <i>n</i> =617) |          |                 | Male<br>( <i>n</i> =793) | Female<br>( <i>n</i> =314) |          |                 |
| GAD-7 score                      | 6.17±4.97                 | 7.40±5.57                  | -5.548   | <0.001          | 6.23±5.17                | 7.65±5.72                  | -4.772   | <0.001          | 6.12±4.78                | 6.92±5.26                  | -2.460   | 0.014           |
| PHQ-9 score                      | 6.70±5.81                 | 7.59±6.52                  | -3.407   | 0.001           | 6.53±5.89                | 7.69±6.63                  | -3.404   | 0.001           | 6.87±5.74                | 7.39±6.31                  | -1.305   | 0.192           |
| PSQI score                       | 6.69±3.59                 | 7.24±4.01                  | -3.422   | 0.001           | 6.80±3.61                | 7.25±4.03                  | -2.150   | 0.032           | 6.59±3.57                | 7.23±3.99                  | -2.456   | 0.014           |
| IBD-Q score                      | 177.51±30.12              | 173.00±32.24               | 3.455    | 0.001           | 173.80±32.21             | 170.78±32.97               | 1.710    | 0.088           | 181.04±27.55             | 177.37±30.34               | 1.860    | 0.063           |
| Bowel symptoms                   | 58.05±9.92                | 56.79±10.61                | 2.920    | 0.004           | 56.16±10.76              | 55.63±10.92                | 0.902    | 0.367           | 59.85±8.69               | 59.09±9.59                 | 1.218    | 0.224           |
| Systemic symptoms                | 27.25±5.31                | 26.67±5.57                 | 2.567    | 0.010           | 26.96±5.54               | 26.38±5.65                 | 1.908    | 0.057           | 27.52±5.07               | 27.24±5.36                 | 0.814    | 0.416           |
| Emotional ability                | 66.93±12.25               | 64.50±13.46                | 4.501    | <0.001          | 65.70±12.70              | 63.77±13.60                | 2.714    | 0.007           | 68.10±11.71              | 65.93±13.08                | 2.558    | 0.011           |
| Social ability                   | 25.29±4.93                | 25.04±5.18                 | 1.175    | 0.240           | 24.98±5.21               | 25.00±5.23                 | -0.069   | 0.945           | 25.58±4.64               | 25.11±5.10                 | 1.396    | 0.163           |
