# Supplementary material for: Gender Differences in Psychological Symptoms and Quality of Life in Patients with Inflammatory Bowel Disease in China: A Multicenter Study
Source: J Clin Med. 2023 Feb 23;12(5):1791. doi: 10.3390/jcm12051791 (PMC10002859; doi:10.3390/jcm12051791)
Supplement: Supplementary file 1 [file jcm-12-01791-s001.zip › Supplementary Table S2.pdf]

**Supplementary Table S2.** Univariate analysis of influencing factors of psychological symptoms, sleep quality and quality of life in male

| patients with IBD [n(%)] |                |                |             |               |                |             |                   |                |             |                      |                |             |
|--------------------------|----------------|----------------|-------------|---------------|----------------|-------------|-------------------|----------------|-------------|----------------------|----------------|-------------|
| Variable                 | Anxiety        |                |             | Depression    |                |             | Sleep disturbance |                |             | Poor quality of life |                |             |
|                          | No<br>(n=1200) | Yes<br>(n=347) | P-<br>value | No<br>(n=623) | Yes<br>(n=308) | P-<br>value | No<br>(n=644)     | Yes<br>(n=903) | P-<br>value | No<br>(n=1003)       | Yes<br>(n=544) | P-<br>value |
| Age (years old)          |                |                | 0.282       |               |                | 0.556       |                   |                | 0.725       |                      |                | 0.895       |
| 18~35                    | 651(54.3)      | 181(52.2)      |             | 599(53.6)     | 233 (54.3)     |             | 352(54.7)         | 480(53.2)      |             | 543(54.1)            | 289(53.1)      |             |
| 36~60                    | 473(39.4)      | 150(43.2)      |             | 448(40.1)     | 175(40.8)      |             | 252(39.1)         | 371(41.1)      |             | 402(40.1)            | 221(40.6)      |             |
| >60                      | 76(6.3)        | 16(4.6)        |             | 71(6.4)       | 21(4.9)        |             | 40(6.2)           | 52(5.8)        |             | 58(5.8)              | 34(6.3)        |             |
| First visit              |                |                | 0.004       |               |                | <0.001      |                   |                | 0.029       |                      |                | <0.001      |
| Yes                      | 212(17.7)      | 85(24.5)       |             | 189(16.9)     | 108(25.2)      |             | 107(16.6)         | 190(21.0)      |             | 153(15.3)            | 144(26.5)      |             |
| No                       | 988(82.3)      | 262(75.5)      |             | 929(83.1)     | 321(74.8)      |             | 537(83.4)         | 713(79.0)      |             | 850(84.7)            | 400(73.5)      |             |
| Disease activity         |                |                | <0.001      |               |                | 0.002       |                   |                | 0.077       |                      |                | <0.001      |
| Remission                | 518(43.2)      | 107(30.8)      |             | 478(42.8)     | 147(34.3)      |             | 277(43.0)         | 348(38.5)      |             | 519(51.7)            | 106(19.5)      |             |
| Active                   | 682(56.8)      | 240(69.2)      | 0.159       | 640(57.2)     | 282(65.7)      | 0.371       | 367(57.0)         | 555(61.5)      | 0.251       | 484(48.3)            | 438(80.5)      | <0.001      |
| Mild                     | 274(40.2)      | 94(39.2)       |             | 261(40.8)     | 107(37.9)      |             | 151(41.1)         | 217(39.1)      |             | 234 (48.3)           | 134(30.6)      |             |
| Moderate                 | 317(46.5)      | 102(42.5)      |             | 292(45.6)     | 127(45.0)      |             | 171(46.6)         | 248(44.7)      |             | 204(42.1)            | 215(49.1)      |             |
| Severe                   | 91(13.3)       | 44(18.3)       |             | 87(13.6)      | 48(17.0)       |             | 45 (12.3)         | 90(16.2)       |             | 46(9.5)              | 89(20.3)       |             |
| Disease type             |                |                | 0.015       |               |                | 0.311       |                   |                | 0.827       |                      |                | <0.001      |
| UC                       | 565(47.1)      | 189(54.5)      |             | 536(47.9)     | 218(50.8)      |             | 316(49.1)         | 438(48.5)      |             | 454(45.3)            | 300(55.1)      |             |
| CD                       | 635(52.9)      | 158(45.5)      |             | 582(52.1)     | 211(49.2)      |             | 328(50.9)         | 465(51.5)      |             | 549(54.7)            | 244(44.9)      |             |
| Disease duration         |                |                | 0.634       |               |                | 0.087       |                   |                | 0.087       |                      |                | 0.015       |
| <2 years                 | 438(36.5)      | 122(35.3)      |             | 423(37.9)     | 137(32.0)      |             | 253(39.3)         | 307(34.0)      |             | 337(33.7)            | 223(41.0)      |             |
| 2~5 years                | 390(32.5)      | 122(35.3)      |             | 357(32.0)     | 155(36.2)      |             | 207(32.2)         | 305(33.8)      |             | 349(34.9)            | 163(30.0)      |             |
| >5 years                 | 371(30.9)      | 102(29.5)      |             | 337(30.2)     | 136(31.8)      |             | 183(28.5)         | 290(32.2)      |             | 315(31.5)            | 158(29.0)      |             |

|                                  |            |           |        |            |           |           |           |           |           |
|----------------------------------|------------|-----------|--------|------------|-----------|-----------|-----------|-----------|-----------|
| Diarrhea                         |            |           | 0.632  |            | 0.440     |           | 0.890     |           | <0.001    |
| Yes                              | 716(59.7)  | 212(61.1) |        | 664(59.4)  | 264(61.5) | 385(59.8) | 543(60.1) | 556(55.4) | 372(68.4) |
| No                               | 484(40.3)  | 135(38.9) |        | 454(40.6)  | 165(38.5) | 259(40.2) | 360(39.9) | 447(44.6) | 172(31.6) |
| Hematochezia                     |            |           | <0.001 |            | 0.079     |           | 0.101     |           | <0.001    |
| Yes                              | 443(36.9)  | 166(47.8) |        | 425(38.0)  | 184(42.9) | 238(37.0) | 371(41.1) | 325(32.4) | 284(52.2) |
| No                               | 757(63.1)  | 181(52.2) |        | 693(62.0)  | 245(57.1) | 406(63.0) | 532(58.9) | 678(67.6) | 260(47.8) |
| Abdominal pain                   |            |           | 0.221  |            | 0.010     |           | 0.931     |           | <0.001    |
| Yes                              | 668(55.7)  | 206(59.4) |        | 609(54.5)  | 265(61.8) | 363(56.4) | 511(56.6) | 511(50.9) | 363(66.7) |
| No                               | 532(44.3)  | 141(40.6) |        | 509(45.5)  | 164(38.2) | 281(43.6) | 392(43.4) | 492(49.1) | 181(33.3) |
| Extraintestinal<br>manifestation |            |           | 0.184  |            | 0.249     |           | 0.157     |           | 0.014     |
| Yes                              | 88(7.3)    | 33(9.5)   |        | 82(7.3)    | 39(9.1)   | 43(6.7)   | 78(8.6)   | 66(6.6)   | 55(10.1)  |
| No                               | 1112(92.7) | 314(90.5) |        | 1036(92.7) | 390(90.9) | 601(93.3) | 825(91.4) | 937(93.4) | 489(89.9) |
| Comorbidities                    |            |           | 0.958  |            | 0.625     |           | 0.308     |           | 0.181     |
| Yes                              | 113(9.4)   | 33(9.5)   |        | 103(9.2)   | 43(10.0)  | 55(8.5)   | 91(10.1)  | 102(10.2) | 44(8.1)   |
| No                               | 1087(90.6) | 314(90.5) |        | 1015(90.8) | 386(90.0) | 589(91.5) | 812(89.9) | 901(89.8) | 500(91.9) |
| 5-Aminosalicylic acid            |            |           | 0.045  |            | 0.504     |           | 0.429     |           | -         |
| Yes                              | 678(56.5)  | 217(62.5) |        | 641(57.3)  | 254(59.2) | 365(56.7) | 530(58.7) | -         | -         |
| No                               | 522(43.5)  | 130(37.5) |        | 477(42.7)  | 175(40.8) | 279(43.3) | 373(41.3) | -         | -         |
| Glucocorticoids                  |            |           | 0.726  |            | 0.380     |           | 0.543     |           | -         |
| Yes                              | 181(15.1)  | 55(15.9)  |        | 165(14.8)  | 71(16.6)  | 94(14.6)  | 142(15.7) | -         | -         |
| No                               | 1019(84.9) | 292(84.1) |        | 953(85.2)  | 358(83.4) | 550(85.4) | 761(84.3) | -         | -         |
| Immunosuppressants               |            |           | 0.077  |            | 0.972     |           | 0.551     |           | 0.138     |
| Yes                              | 203(16.9)  | 45(13.0)  |        | 179(16.0)  | 69(16.1)  | 99(15.4)  | 149(16.5) | 171(17.0) | 77(14.2)  |
| No                               | 997(83.1)  | 302(87.0) |        | 939(84.0)  | 360(83.9) | 545(84.6) | 754(83.5) | 832(83.0) | 467(85.8) |
| Biological agents                |            |           | 0.128  |            | 0.526     |           | 0.966     |           | 0.154     |

|                      |            |           |        |            |           |        |           |           |        |           |           |        |
|----------------------|------------|-----------|--------|------------|-----------|--------|-----------|-----------|--------|-----------|-----------|--------|
| Yes                  | 688(57.3)  | 183(52.7) |        | 635(56.8)  | 236(55.0) |        | 363(56.4) | 508(56.3) |        | 578(57.6) | 293(53.9) |        |
| No                   | 512(42.7)  | 164(47.3) |        | 483(43.2)  | 193(45.0) |        | 281(43.6) | 395(43.7) |        | 425(42.4) | 251(46.1) |        |
| IBD-related surgery  |            |           | 0.135  |            |           | 0.237  |           |           | 0.768  |           |           | 0.572  |
| Yes                  | 180(15.0)  | 41(11.8)  |        | 167(14.9)  | 54(12.6)  |        | 90(14.0)  | 131(14.5) |        | 147(14.7) | 74(13.6)  |        |
| No                   | 1020(85.0) | 306(88.2) |        | 951(85.1)  | 375(87.4) |        | 554(86.0) | 772(85.5) |        | 856(85.3) | 470(86.4) |        |
| Anxiety              |            |           | -      |            |           | <0.001 |           |           | <0.001 |           |           | <0.001 |
| Yes                  | -          | -         |        | 79(7.1)    | 268(62.5) |        | 42(6.5)   | 305(33.8) |        | 154(15.4) | 193(35.5) |        |
| No                   | -          | -         |        | 1039(92.9) | 161(37.5) |        | 602(93.5) | 598(66.2) |        | 849(84.6) | 351(64.5) |        |
| Depression           |            |           | <0.001 |            |           | -      |           |           | <0.001 |           |           | <0.001 |
| Yes                  | 161(13.4)  | 268(77.2) |        | -          | -         |        | 37(5.7)   | 392(43.4) |        | 195(19.4) | 234(43.0) |        |
| No                   | 1039(86.6) | 79(22.8)  |        | -          | -         |        | 607(94.3) | 511(56.6) |        | 808(80.6) | 310(57.0) |        |
| Sleep disturbance    |            |           | <0.001 |            |           | <0.001 |           |           | -      |           |           | <0.001 |
| Yes                  | 598(49.8)  | 305(87.9) |        | 511(45.7)  | 392(91.4) |        | -         | -         |        | 513(51.1) | 390(71.7) |        |
| No                   | 602(50.2)  | 42(12.1)  |        | 607(54.3)  | 37(8.6)   |        | -         | -         |        | 490(48.9) | 154(28.3) |        |
| Poor quality of life |            |           | <0.001 |            |           | <0.001 |           |           | <0.001 |           |           | -      |
| Yes                  | 351(29.3)  | 193(55.6) |        | 310(27.7)  | 234(54.5) |        | 154(23.9) | 390(43.2) |        | -         | -         |        |
| No                   | 849(70.8)  | 154(44.4) |        | 808(72.3)  | 195(45.5) |        | 490(76.1) | 513(56.8) |        | -         | -         |        |
