# Supplementary material for: Gender Differences in Psychological Symptoms and Quality of Life in Patients with Inflammatory Bowel Disease in China: A Multicenter Study
Source: J Clin Med. 2023 Feb 23;12(5):1791. doi: 10.3390/jcm12051791 (PMC10002859; doi:10.3390/jcm12051791)
Supplement: Supplementary file 1 [file jcm-12-01791-s001.zip › Supplementary Table S3.pdf]

**Supplementary Table S3.** Univariate analysis of influencing factors of psychological symptoms, sleep quality and quality of life in female patients with IBD [n(%)]

| Variable         | Anxiety       |                |             | Depression    |                |             | Sleep disturbance |                |             | Poor quality of life |                |             |
|------------------|---------------|----------------|-------------|---------------|----------------|-------------|-------------------|----------------|-------------|----------------------|----------------|-------------|
|                  | No<br>(n=647) | Yes<br>(n=284) | P-<br>value | No<br>(n=623) | Yes<br>(n=308) | P-<br>value | No<br>(n=343)     | Yes<br>(n=588) | P-<br>value | No<br>(n=542)        | Yes<br>(n=389) | P-<br>value |
| Age (years old)  |               |                | 0.969       |               |                | 0.939       |                   |                | 0.176       |                      |                | 0.652       |
| 18~35            | 288(44.5)     | 124(43.7)      |             | 276(44.3)     | 136(44.2)      |             | 165(48.1)         | 247(42.0)      |             | 246(45.4)            | 166(42.7)      |             |
| 36~60            | 326(50.4)     | 145(51.1)      |             | 316(50.7)     | 155(50.3)      |             | 163(47.5)         | 308(52.4)      |             | 270(49.8)            | 201(51.7)      |             |
| >60              | 33(5.1)       | 15(5.3)        |             | 31(5.0)       | 17(5.5)        |             | 15(4.4)           | 33(5.6)        |             | 26(4.8)              | 22(5.7)        |             |
| First visit      |               |                | 0.050       |               |                | 0.083       |                   |                | 0.301       |                      |                | <0.001      |
| Yes              | 125(19.3)     | 71(25.0)       |             | 121(19.4)     | 75(24.4)       |             | 66(19.2)          | 130(22.1)      |             | 85(15.7)             | 111(28.5)      |             |
| No               | 522(80.7)     | 213(75.0)      |             | 502(80.6)     | 233(75.6)      |             | 277(80.8)         | 458(77.9)      |             | 457(84.3)            | 278(71.5)      |             |
| Disease activity |               |                | <0.001      |               |                | 0.001       |                   |                | 0.017       |                      |                | <0.001      |
| Remission        | 247(38.2)     | 74(26.1)       |             | 237(38.0)     | 84(27.3)       |             | 135(39.4)         | 186(31.6)      |             | 262(48.3)            | 59(15.2)       |             |
| Active           | 400(61.8)     | 210(73.9)      | 0.030       | 386(62.0)     | 224(72.7)      | 0.004       | 208(60.6)         | 402(68.4)      | 0.058       | 280(51.7)            | 330(84.8)      | <0.001      |
| Mild             | 148(37.0)     | 72(34.3)       |             | 135(35.0)     | 85(37.9)       |             | 74(35.6)          | 146(36.3)      |             | 119(42.5)            | 101(30.6)      |             |
| Moderate         | 213(53.3)     | 102(48.6)      |             | 215(55.7)     | 100(44.6)      |             | 117(56.3)         | 198(49.3)      |             | 146(52.1)            | 169(51.2)      |             |
| Severe           | 39(9.8)       | 36(17.1)       |             | 36(9.3)       | 39(17.4)       |             | 17(8.2)           | 58(14.4)       |             | 15(5.4)              | 60(18.2)       |             |
| Disease type     |               |                | 0.076       |               |                | 0.246       |                   |                | 0.850       |                      |                | 0.005       |
| UC               | 417(64.5)     | 200(70.4)      |             | 405(65.0)     | 212(68.8)      |             | 226(65.9)         | 391(66.5)      |             | 339(62.5)            | 278(71.5)      |             |
| CD               | 230(35.5)     | 84(29.6)       |             | 218(35.0)     | 96(31.2)       |             | 117(34.1)         | 197(33.5)      |             | 203(37.5)            | 111(28.5)      |             |
| Disease duration |               |                | 0.641       |               |                | 0.753       |                   |                | 0.481       |                      |                | 0.228       |
| <2 years         | 269(41.6)     | 110(38.7)      |             | 255(40.9)     | 124(40.3)      |             | 148(43.1)         | 231(39.3)      |             | 209(38.6)            | 170(43.7)      |             |
| 2~5 years        | 170(26.3)     | 82(28.9)       |             | 164(26.3)     | 88(28.6)       |             | 91(26.5)          | 161(27.4)      |             | 156(28.8)            | 96(24.7)       |             |
| >5 years         | 208(32.1)     | 92(32.4)       |             | 204(32.7)     | 96(31.2)       |             | 104(30.3)         | 196(33.3)      |             | 177(32.7)            | 123(31.6)      |             |

|                                  |           |           |       |           |           |  |           |           |           |           |
|----------------------------------|-----------|-----------|-------|-----------|-----------|--|-----------|-----------|-----------|-----------|
| Diarrhea                         |           |           | 0.094 |           | 0.041     |  | 0.672     |           | <0.001    |           |
| Yes                              | 398(61.5) | 191(67.3) |       | 380(61.0) | 209(67.9) |  | 220(64.1) | 369(62.8) | 296(54.6) | 293(75.3) |
| No                               | 135(42.7) | 93(32.7)  |       | 243(39.0) | 99(32.1)  |  | 123(35.9) | 219(37.2) | 246(45.4) | 96(24.7)  |
| Hematochezia                     |           |           | 0.002 |           | 0.031     |  | 0.200     |           | <0.001    |           |
| Yes                              | 290(44.8) | 159(56.0) |       | 285(45.7) | 164(53.2) |  | 156(45.5) | 293(49.8) | 212(39.1) | 237(60.9) |
| No                               | 357(55.2) | 125(44.0) |       | 338(54.3) | 144(46.8) |  | 187(54.5) | 295(50.2) | 330(60.9) | 152(39.1) |
| Abdominal pain                   |           |           | 0.330 |           | 0.810     |  | 0.425     |           | <0.001    |           |
| Yes                              | 372(57.5) | 173(60.9) |       | 363(58.3) | 182(59.1) |  | 195(56.9) | 350(59.5) | 282(52.0) | 263(67.6) |
| No                               | 275(42.5) | 111(39.1) |       | 260(41.7) | 126(40.9) |  | 148(43.1) | 238(40.5) | 260(48.0) | 126(32.4) |
| Extraintestinal<br>manifestation |           |           | 0.156 |           | 0.905     |  | 0.928     |           | 0.967     |           |
| Yes                              | 59(9.1)   | 18(6.3)   |       | 52(8.3)   | 25(8.1)   |  | 28(8.2)   | 49(8.3)   | 45(8.3)   | 32(8.2)   |
| No                               | 588(90.9) | 266(93.7) |       | 571(91.7) | 283(91.9) |  | 315(91.8) | 539(91.7) | 497(91.7) | 357(91.8) |
| Comorbidities                    |           |           | 0.559 |           | 0.115     |  | 0.725     |           | 0.469     |           |
| Yes                              | 43(6.6)   | 16(5.6)   |       | 45(7.2)   | 14(4.5)   |  | 23(6.7)   | 36(6.1)   | 37(6.8)   | 22(5.7)   |
| No                               | 604(93.4) | 268(94.4) |       | 578(92.8) | 294(95.5) |  | 320(93.3) | 552(93.9) | 505(93.2) | 367(94.3) |
| 5-Aminosalicylic acid            |           |           | 0.032 |           | 0.324     |  | 0.285     |           | -         |           |
| Yes                              | 428(66.2) | 208(73.2) |       | 419(67.3) | 217(70.5) |  | 227(66.2) | 409(69.6) | -         | -         |
| No                               | 219(33.8) | 76(26.8)  |       | 204(32.7) | 91(29.5)  |  | 116(33.8) | 179(30.4) | -         | -         |
| Glucocorticoids                  |           |           | 0.538 |           | 0.520     |  | 0.367     |           | -         |           |
| Yes                              | 99(15.3)  | 48(16.9)  |       | 95(15.2)  | 52(16.9)  |  | 59(17.2)  | 88(15.0)  | -         | -         |
| No                               | 548(84.7) | 236(83.1) |       | 528(84.8) | 256(83.1) |  | 284(82.8) | 500(85.0) | -         | -         |
| Immunosuppressants               |           |           | 0.015 |           | 0.085     |  | 0.159     |           | 0.568     |           |
| Yes                              | 89(13.8)  | 23(8.1)   |       | 83(13.3)  | 29(9.4)   |  | 48(14.0)  | 64(10.9)  | 68(12.5)  | 44(11.3)  |
| No                               | 558(86.2) | 261(91.9) |       | 540(86.7) | 279(90.6) |  | 295(86.0) | 524(89.1) | 474(87.5) | 345(88.7) |
| Biological agents                |           |           | 0.036 |           | 0.325     |  | 0.135     |           | 0.023     |           |

|                      |           |           |        |           |           |        |           |           |        |           |           |
|----------------------|-----------|-----------|--------|-----------|-----------|--------|-----------|-----------|--------|-----------|-----------|
| Yes                  | 294(45.4) | 108(38.0) |        | 276(44.3) | 126(40.9) |        | 159(46.4) | 243(41.3) |        | 251(46.3) | 151(38.8) |
| No                   | 353(54.6) | 176(62.0) |        | 347(55.7) | 182(59.1) |        | 184(53.6) | 345(58.7) |        | 291(53.7) | 238(61.2) |
| IBD-related surgery  |           |           | 0.114  |           |           | 0.276  |           |           | 0.564  |           | 0.013     |
| Yes                  | 64(9.9)   | 19(6.7)   |        | 60(9.6)   | 23(7.5)   |        | 33(9.6)   | 50(8.5)   |        | 59(10.9)  | 24(6.2)   |
| No                   | 583(90.1) | 265(93.3) |        | 563(90.4) | 285(92.5) |        | 310(90.4) | 538(91.5) |        | 483(89.1) | 365(93.8) |
| Anxiety              |           |           | -      |           |           | <0.001 |           |           | <0.001 |           | <0.001    |
| Yes                  | -         | -         |        | 52(8.3)   | 232(75.3) |        | 34(9.9)   | 250(42.5) |        | 117(21.6) | 167(42.9) |
| No                   | -         | -         |        | 571(91.7) | 76(24.7)  |        | 309(90.1) | 338(57.5) |        | 425(78.4) | 222(57.1) |
| Depression           |           |           | <0.001 |           |           | -      |           |           | <0.001 |           | <0.001    |
| Yes                  | 76(11.7)  | 232(81.7) |        | -         | -         |        | 32(9.3)   | 276(46.9) |        | 129(23.8) | 179(46.0) |
| No                   | 571(88.3) | 52(18.3)  |        | -         | -         |        | 311(90.7) | 312(53.1) |        | 413(76.2) | 210(54.0) |
| Sleep disturbance    |           |           | <0.001 |           |           | <0.001 |           |           | -      |           | <0.001    |
| Yes                  | 338(52.2) | 250(88.0) |        | 312(50.1) | 276(89.6) |        | -         | -         |        | 309(57.0) | 279(71.7) |
| No                   | 309(47.8) | 34(12.0)  |        | 311(49.9) | 32(10.4)  |        | -         | -         |        | 233(43.0) | 110(28.3) |
| Poor quality of life |           |           | <0.001 |           |           | <0.001 |           |           | <0.001 |           | -         |
| Yes                  | 222(34.3) | 167(58.8) |        | 210(33.7) | 179(58.1) |        | 110(32.1) | 279(47.4) |        | -         | -         |
| No                   | 425(65.7) | 117(41.2) |        | 413(66.3) | 129(41.9) |        | 233(67.9) | 309(52.6) |        | -         | -         |
