# Supplementary material for: Gender Differences in Psychological Symptoms and Quality of Life in Patients with Inflammatory Bowel Disease in China: A Multicenter Study
Source: J Clin Med. 2023 Feb 23;12(5):1791. doi: 10.3390/jcm12051791 (PMC10002859; doi:10.3390/jcm12051791)
Supplement: Supplementary file 1 [file jcm-12-01791-s001.zip › Supplementary Table S4.pdf]

**Supplementary Table S4.** Multivariate Logistic analysis of influencing factors of psychological symptoms, sleep quality and quality of life

| in male patients with IBD              |         |       |               |         |        |             |             |
|----------------------------------------|---------|-------|---------------|---------|--------|-------------|-------------|
| Variable                               | $\beta$ | S.E.  | Wald $\chi^2$ | P-value | OR     | 95% CI      |             |
|                                        |         |       |               |         |        | Lower limit | Upper limit |
| <b>Anxiety</b>                         |         |       |               |         |        |             |             |
| First visit (Yes vs No)                | -0.008  | 0.192 | 0.002         | 0.966   | 0.992  | 0.681       | 1.445       |
| Disease activity (Active vs Remission) | 0.182   | 0.185 | 0.975         | 0.323   | 1.200  | 0.836       | 1.723       |
| Disease type (CD vs UC)                | -0.120  | 0.211 | 0.326         | 0.568   | 0.887  | 0.587       | 1.340       |
| Hematochezia (Yes vs No)               | 0.265   | 0.196 | 1.837         | 0.175   | 1.304  | 0.888       | 1.913       |
| 5-Aminosalicylic acid (Yes vs No)      | 0.017   | 0.196 | 0.007         | 0.931   | 1.017  | 0.692       | 1.494       |
| Depression (Yes vs No)                 | 2.697   | 0.167 | 262.123       | 0.000   | 14.834 | 10.702      | 20.562      |
| Sleep disturbance (Yes vs No)          | 0.871   | 0.204 | 18.290        | 0.000   | 2.388  | 1.603       | 3.559       |
| Poor quality of life (Yes vs No)       | 0.444   | 0.165 | 7.215         | 0.007   | 1.558  | 1.127       | 2.154       |
| <b>Depression</b>                      |         |       |               |         |        |             |             |
| First visit (Yes vs No)                | 0.347   | 0.185 | 3.508         | 0.061   | 1.414  | 0.984       | 2.033       |
| Disease activity (Active vs Remission) | -0.201  | 0.169 | 1.411         | 0.235   | 0.818  | 0.587       | 1.140       |
| Abdominal pain (Yes vs No)             | 0.328   | 0.157 | 4.362         | 0.037   | 1.388  | 1.020       | 1.887       |
| Anxiety (Yes vs No)                    | 2.695   | 0.166 | 263.261       | 0.000   | 14.806 | 10.692      | 20.503      |
| Sleep disturbance (Yes vs No)          | 2.058   | 0.201 | 104.480       | 0.000   | 7.832  | 5.278       | 11.622      |
| Poor quality of life (Yes vs No)       | 0.636   | 0.164 | 15.092        | 0.000   | 1.888  | 1.370       | 2.602       |
| <b>Sleep disturbance</b>               |         |       |               |         |        |             |             |
| First visit (Yes vs No)                | 0.029   | 0.152 | 0.036         | 0.850   | 1.029  | 0.764       | 1.386       |
| Anxiety (Yes vs No)                    | 0.847   | 0.203 | 17.354        | 0.000   | 2.332  | 1.566       | 3.473       |
| Depression (Yes vs No)                 | 2.035   | 0.200 | 103.125       | 0.000   | 7.649  | 5.165       | 11.327      |

|                                           |        |       |         |       |       |       |       |
|-------------------------------------------|--------|-------|---------|-------|-------|-------|-------|
| Poor quality of life (Yes vs No)          | 0.483  | 0.128 | 14.298  | 0.000 | 1.622 | 1.262 | 2.084 |
| <b>Poor quality of life</b>               |        |       |         |       |       |       |       |
| First visit (Yes vs No)                   | 0.473  | 0.152 | 9.669   | 0.002 | 1.604 | 1.191 | 2.161 |
| Disease activity (High vs Low)            | 0.665  | 0.065 | 103.925 | 0.000 | 1.944 | 1.711 | 2.209 |
| Disease type (CD vs UC)                   | -0.019 | 0.146 | 0.017   | 0.895 | 0.981 | 0.737 | 1.306 |
| Disease course (Long vs Short)            | -0.107 | 0.075 | 2.050   | 0.152 | 0.898 | 0.776 | 1.040 |
| Diarrhea (Yes vs No)                      | 0.250  | 0.131 | 3.663   | 0.056 | 1.284 | 0.994 | 1.658 |
| Hematochezia (Yes vs No)                  | 0.223  | 0.149 | 2.227   | 0.136 | 1.250 | 0.932 | 1.675 |
| Abdominal pain (Yes vs No)                | 0.423  | 0.128 | 10.949  | 0.001 | 1.526 | 1.188 | 1.961 |
| Extraintestinal manifestation (Yes vs No) | 0.303  | 0.218 | 1.932   | 0.165 | 1.355 | 0.883 | 2.078 |
| Anxiety (Yes vs No)                       | 0.460  | 0.169 | 7.378   | 0.007 | 1.584 | 1.137 | 2.208 |
| Depression (Yes vs No)                    | 0.644  | 0.165 | 15.175  | 0.000 | 1.905 | 1.377 | 2.634 |
| Sleep disturbance (Yes vs No)             | 0.547  | 0.137 | 15.941  | 0.000 | 1.728 | 1.321 | 2.260 |
