# Supplementary material for: Gender Differences in Psychological Symptoms and Quality of Life in Patients with Inflammatory Bowel Disease in China: A Multicenter Study
Source: J Clin Med. 2023 Feb 23;12(5):1791. doi: 10.3390/jcm12051791 (PMC10002859; doi:10.3390/jcm12051791)
Supplement: Supplementary file 1 [file jcm-12-01791-s001.zip › Supplementary Table S5.pdf]

**Supplementary Table S5.** Multivariate Logistic analysis of influencing factors of psychological symptoms, sleep quality and quality of life in

| female patients with IBD               |         |             |                      |                 |           |             |             |
|----------------------------------------|---------|-------------|----------------------|-----------------|-----------|-------------|-------------|
| Variable                               | $\beta$ | <i>S.E.</i> | <i>Wald</i> $\chi^2$ | <i>P</i> -value | <i>OR</i> | 95% CI      |             |
|                                        |         |             |                      |                 |           | Lower limit | Upper limit |
| <b>Anxiety</b>                         |         |             |                      |                 |           |             |             |
| First visit (Yes vs No)                | 0.066   | 0.243       | 0.074                | 0.786           | 1.068     | 0.664       | 1.718       |
| Disease activity (High vs Low)         | 0.138   | 0.118       | 1.373                | 0.241           | 1.148     | 0.911       | 1.447       |
| Hematochezia (Yes vs No)               | 0.189   | 0.227       | 0.691                | 0.406           | 1.208     | 0.774       | 1.886       |
| 5-Aminosalicylic acid (Yes vs No)      | 0.056   | 0.286       | 0.038                | 0.845           | 1.058     | 0.604       | 1.853       |
| Immunosuppressants (Yes vs No)         | -0.476  | 0.338       | 1.978                | 0.160           | 0.621     | 0.320       | 1.206       |
| Biological agents (Yes vs No)          | -0.255  | 0.262       | 0.952                | 0.329           | 0.775     | 0.464       | 1.294       |
| Depression (Yes vs No)                 | 3.204   | 0.207       | 240.438              | 0.000           | 24.637    | 16.432      | 36.938      |
| Sleep disturbance (Yes vs No)          | 0.890   | 0.249       | 12.797               | 0.000           | 2.435     | 1.495       | 3.964       |
| Poor quality of life (Yes vs No)       | 0.379   | 0.216       | 3.082                | 0.079           | 1.461     | 0.957       | 2.232       |
| <b>Depression</b>                      |         |             |                      |                 |           |             |             |
| Disease activity (High vs Low)         | -0.054  | 0.116       | 0.218                | 0.641           | 0.947     | 0.755       | 1.189       |
| Diarrhea (Yes vs No)                   | 0.262   | 0.216       | 1.467                | 0.226           | 1.299     | 0.851       | 1.984       |
| Hematochezia (Yes vs No)               | -0.073  | 0.220       | 0.110                | 0.740           | 0.929     | 0.604       | 1.431       |
| Anxiety (Yes vs No)                    | 3.192   | 0.205       | 241.732              | 0.000           | 24.343    | 16.278      | 36.404      |
| Sleep disturbance (Yes vs No)          | 1.588   | 0.246       | 41.752               | 0.000           | 4.892     | 3.022       | 7.918       |
| Poor quality of life (Yes vs No)       | 0.566   | 0.212       | 7.117                | 0.008           | 1.761     | 1.162       | 2.670       |
| <b>Sleep disturbance</b>               |         |             |                      |                 |           |             |             |
| Disease activity (Active vs Remission) | 0.068   | 0.164       | 0.170                | 0.680           | 1.070     | 0.776       | 1.477       |
| Anxiety (Yes vs No)                    | 0.883   | 0.245       | 13.011               | 0.000           | 2.418     | 1.497       | 3.907       |

|                                  |        |       |        |       |       |       |       |
|----------------------------------|--------|-------|--------|-------|-------|-------|-------|
| Depression (Yes vs No)           | 1.561  | 0.244 | 41.032 | 0.000 | 4.766 | 2.956 | 7.685 |
| Poor quality of life (Yes vs No) | 0.251  | 0.167 | 2.272  | 0.132 | 1.285 | 0.927 | 1.781 |
| <b>Poor quality of life</b>      |        |       |        |       |       |       |       |
| First visit (Yes vs No)          | 0.543  | 0.185 | 8.572  | 0.003 | 1.721 | 1.197 | 2.475 |
| Disease activity (High vs Low)   | 0.716  | 0.090 | 63.217 | 0.000 | 2.046 | 1.715 | 2.441 |
| Disease type (CD vs UC)          | 0.168  | 0.211 | 0.631  | 0.427 | 1.183 | 0.782 | 1.789 |
| Diarrhea (Yes vs No)             | 0.636  | 0.166 | 14.626 | 0.000 | 1.888 | 1.363 | 2.615 |
| Hematochezia (Yes vs No)         | 0.165  | 0.178 | 0.859  | 0.354 | 1.180 | 0.832 | 1.674 |
| Abdominal pain (Yes vs No)       | 0.413  | 0.162 | 6.522  | 0.011 | 1.511 | 1.101 | 2.073 |
| Biological agents (Yes vs No)    | -0.492 | 0.183 | 7.254  | 0.007 | 0.611 | 0.427 | 0.875 |
| IBD-related surgery (Yes vs No)  | -0.024 | 0.302 | 0.006  | 0.936 | 0.976 | 0.540 | 1.766 |
| Anxiety (Yes vs No)              | 0.359  | 0.219 | 2.693  | 0.101 | 1.431 | 0.933 | 2.197 |
| Depression (Yes vs No)           | 0.618  | 0.219 | 7.953  | 0.005 | 1.855 | 1.207 | 2.851 |
| Sleep disturbance (Yes vs No)    | 0.271  | 0.172 | 2.480  | 0.115 | 1.312 | 0.936 | 1.838 |
